# Supplementary material
Source: MDPI journal article supplement (https://www.mdpi.com/1424-8247/15/2/175)
Supplement: s1 [file s1]

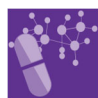

## Article

# Study for Evaluation of Hydrogels after the Incorporation of Liposomes Embedded with Caffeic Acid

Ioana Lavinia Dejeu <sup>1</sup>, Laura Grațîela Vicaș <sup>2,\*</sup>, Lavinia Lia Vlaia <sup>3,\*</sup>, Tunde Jurca <sup>2</sup>, Mariana Eugenia Mureșan <sup>2</sup>, Annamaria Pallag <sup>2</sup>, Georgeta Hermina Coneac <sup>3</sup>, Ioana Viorica Olariu <sup>3</sup>, Ana Maria Muț <sup>3</sup>, Anca Salomea Bodea <sup>1</sup>, George Emanuiel Dejeu <sup>2,†</sup>, Octavian Adrian Maghiar <sup>2</sup> and Eleonora Marian <sup>2</sup>

<sup>1</sup> Doctoral School of Biomedical Science, University of Oradea, 1 University Street, 410087 Oradea, Romania; ioana.dejeu@gmail.com (I.L.D.); salomea.bodea@gmail.com (A.S.B.)

<sup>2</sup> Faculty of Medicine and Pharmacy, University of Oradea, 1 Decembrie Street, 410073 Oradea, Romania; jurcatunde@yahoo.com (T.J.); marianamur2002@yahoo.com (M.E.M.); annamariapallag@gmail.com (A.P.); dejeu.george@gmail.com (G.E.D.); octimaghiar@gmail.com (O.A.M.); marian\_eleonora@yahoo.com (E.M.)

<sup>3</sup> Department II—Pharmaceutical Technology, Formulation and Technology of Drugs Research Center, "Victor Babeș" University of Medicine and Pharmacy, Eftimie Murgu Sq. no. 2, 300041 Timișoara, Romania; coneac.georgeta@umft.ro (G.H.C.); olariu.ioana@umft.ro (I.V.O.); mut.anamaria@umft.ro (A.M.M.)

\* Correspondence: vlaia.lavinia@umft.ro (L.L.V.); laura.vicas@gmail.com (L.G.V.)

† These authors contributed equally to this work.

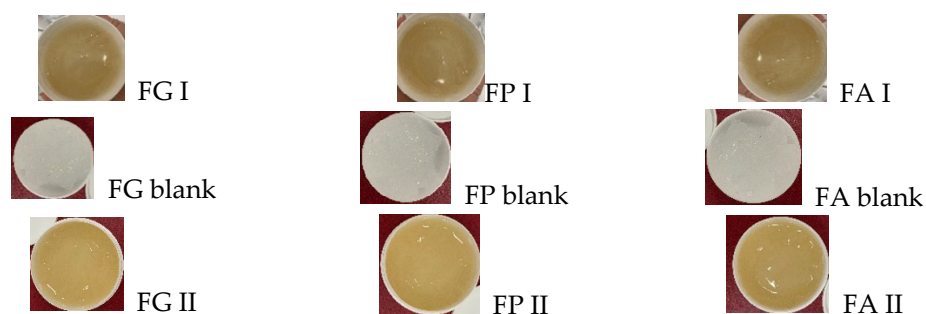

**Figure S1.** The color of hydrogels.

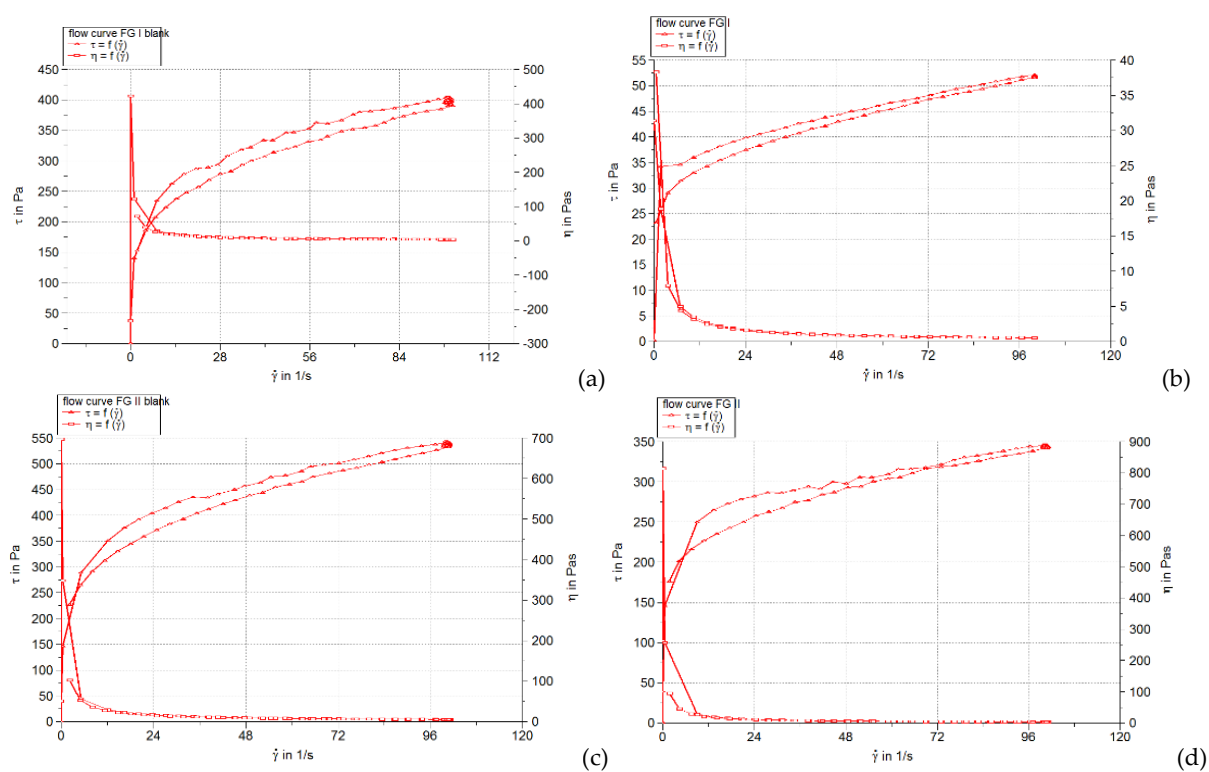

**Figure S2.** Rheograms and viscosity curves of Carbopol 940 and glycerol hydrogels, simple or loaded with caffeic acid liposomes: (a) FGI blank, (b) FGI, (c) FGII blank, (d) FGII.

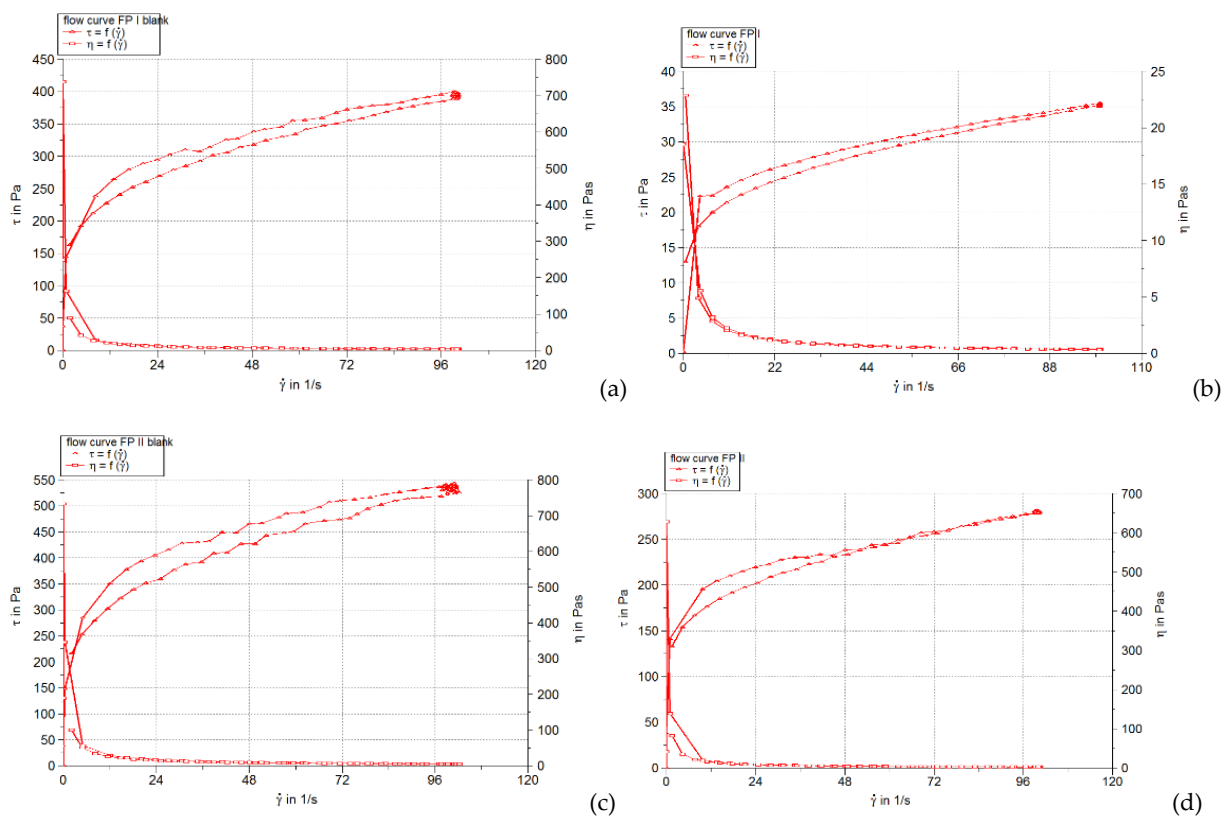

**Figure S3.** Rheograms and viscosity curves of Carbopol 940 and propylene glycol hydrogels, simple or loaded with caffeic acid liposomes: (a) FPI blank, (b) FPI, (c) FPII blank, (d) FPII.

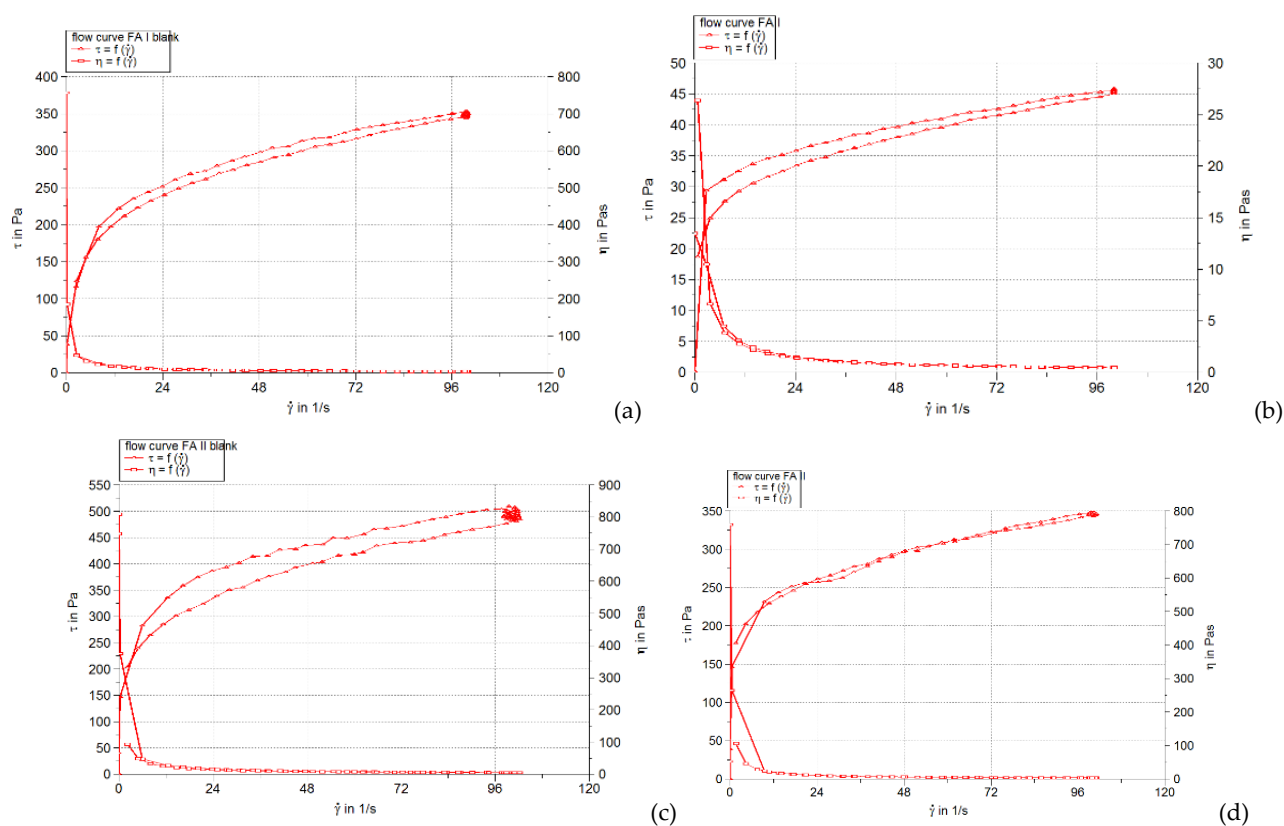

**Figure S4.** Rheograms and viscosity curves of Carbopol 940 and isopropyl alcohol hydrogels, simple or loaded with caffeic acid liposomes: (a) FAI blank, (b) FAI, (c) FAII blank, (d) FAII.

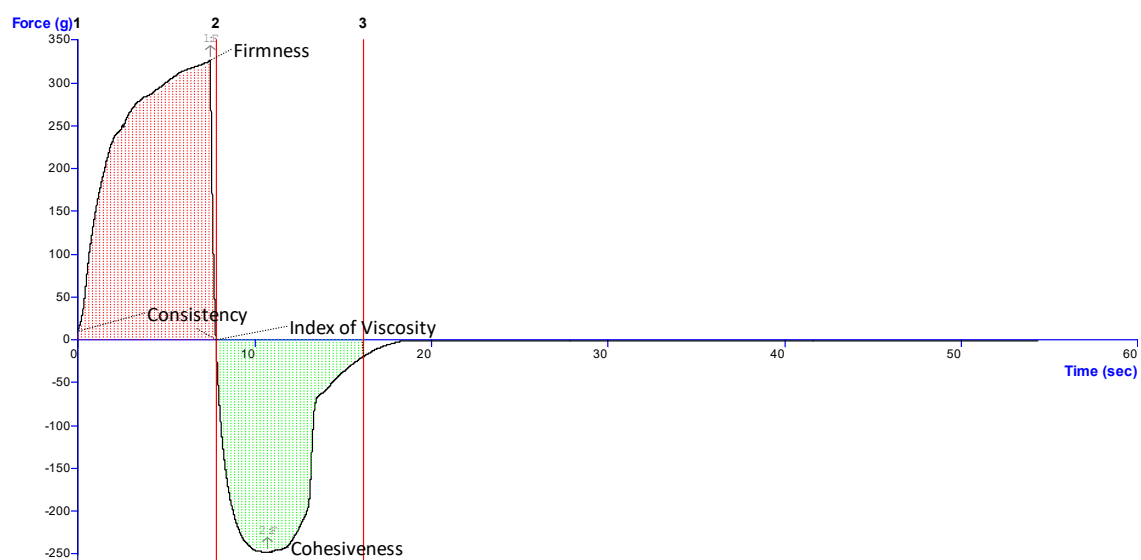

**Figure S5.** Typical force versus time profile and textural parameters determined by the back compression-extrusion test for Carbopol 940 based experimental hydrogels.

**Table S1.** The percent of CA released in time (h) from hydrogels, expressed as mean  $\pm$  standard deviation.

| Time (h) | CA (%)           | FG I (%)         | FP I (%)         | FA I (%)         | FG II (%)        | FP II (%)        | FA II (%)         |
|----------|------------------|------------------|------------------|------------------|------------------|------------------|-------------------|
| 0.5      | 10.32 $\pm$ 0.21 | 3.05 $\pm$ 0.13  | 2.44 $\pm$ 0.09  | 2.64 $\pm$ 0.08  | 2.50 $\pm$ 0.11  | 2.45 $\pm$ 0.09  | 1.65 $\pm$ 0.11   |
| 1        | 24.24 $\pm$ 0.11 | 11.29 $\pm$ 0.22 | 10.38 $\pm$ 0.24 | 10.12 $\pm$ 0.29 | 12.66 $\pm$ 0.26 | 12.06 $\pm$ 0.20 | 11.51 $\pm$ 0.09  |
| 2        | 54.88 $\pm$ 0.18 | 24.16 $\pm$ 0.41 | 23.35 $\pm$ 0.11 | 22.58 $\pm$ 0.41 | 21.72 $\pm$ 0.38 | 21.12 $\pm$ 0.30 | 20.42 $\pm$ 0.037 |
| 3        | 71.96 $\pm$ 1.25 | 34.38 $\pm$ 0.54 | 32.76 $\pm$ 0.33 | 33.93 $\pm$ 0.88 | 31.78 $\pm$ 0.58 | 31.38 $\pm$ 0.51 | 30.43 $\pm$ 0.70  |
| 4        | 91.32 $\pm$ 1.30 | 45.62 $\pm$ 1.10 | 44.35 $\pm$ 1.14 | 44.86 $\pm$ 0.97 | 39.99 $\pm$ 0.81 | 38.84 $\pm$ 0.59 | 38.04 $\pm$ 0.82  |
| 5        | 92.68 $\pm$ 2.92 | 55.34 $\pm$ 1.57 | 53.41 $\pm$ 1.73 | 54.22 $\pm$ 1.91 | 52.25 $\pm$ 1.89 | 51.20 $\pm$ 0.88 | 50.10 $\pm$ 1.19  |
| 6        | 92.88 $\pm$ 3.12 | 69.07 $\pm$ 2.20 | 68.21 $\pm$ 2.01 | 67.39 $\pm$ 2.33 | 61.61 $\pm$ 2.11 | 61.26 $\pm$ 1.52 | 60.01 $\pm$ 2.28  |
| 7        | 93.00 $\pm$ 2.87 | 78.69 $\pm$ 2.55 | 77.36 $\pm$ 1.99 | 77.97 $\pm$ 2.21 | 71.72 $\pm$ 1.99 | 70.67 $\pm$ 2.19 | 69.52 $\pm$ 2.33  |
| 8        | 93.12 $\pm$ 1.98 | 89.27 $\pm$ 3.01 | 87.69 $\pm$ 2.57 | 88.40 $\pm$ 2.49 | 77.13 $\pm$ 2.37 | 76.31 $\pm$ 2.26 | 76.03 $\pm$ 2.40  |
| 12       | 93.24 $\pm$ 3.42 | 88.91 $\pm$ 3.71 | 88.25 $\pm$ 3.41 | 88.76 $\pm$ 2.52 | 86.29 $\pm$ 2.82 | 86.19 $\pm$ 2.33 | 84.98 $\pm$ 2.51  |
